# Supplementary material
Source: PubMed Central journal article supplement (PMC7887661)
Supplement: jama-e210247-s001.pdf [file jama-e210247-s001.pdf]

## Supplemental Online Content

Perak AM, Lancki N, Kuang A, et al; HAPO Follow-Up Study Cooperative Research Group. Associations of maternal cardiovascular health in pregnancy with offspring cardiovascular health in early adolescence. *JAMA*. doi:10.1001/jama.2021.0247

### **eMethods**

### **eResults**

**eTable 1.** Missing Data Among 2,302 Mother-Child Dyads in the Ancillary Study (Primary Analytic Sample)

**eTable 2.** Adjusted Associations of Maternal Gestational (Mean 28 Weeks' Gestation) Cardiovascular Health with Offspring Cardiovascular Health in Childhood

**eTable 3.** Adjusted Associations between Individual Metrics of Maternal Gestational Cardiovascular Health and Offspring Childhood Cardiovascular Health

**eFigure 1.** Sensitivity Analyses of Associations of Maternal Gestational Cardiovascular Health with Offspring Cardiovascular Health Score in Childhood

**eFigure 2.** Sensitivity Analyses of Associations of Maternal Gestational Cardiovascular Health with Offspring All Ideal (versus Any Non-Ideal) Cardiovascular Health Metrics in Childhood

**eFigure 3.** Sensitivity Analyses of Associations of Maternal Gestational Cardiovascular Health with Offspring 1 or More Intermediate (versus All Ideal) Cardiovascular Health Metrics in Childhood

**eFigure 4.** Sensitivity Analyses of Associations of Maternal Gestational Cardiovascular Health with Offspring 1 Poor (versus All Ideal) Cardiovascular Health Metric in Childhood

**eFigure 5.** Sensitivity Analyses of Associations of Maternal Gestational Cardiovascular Health with Offspring 2 or More Poor (versus All Ideal) Cardiovascular Health Metrics in Childhood

### **eReferences**

**eAppendix.** HAPO Follow-Up Study Cooperative Research Group Members

This supplemental material has been provided by the authors to give readers additional information about their work.

## eMethods

### Offspring CVH During Early Adolescence

Height and weight were each measured twice by trained study personnel using calibrated instruments, and BMI was calculated as weight (kg) divided by height squared ( $m^2$ ). Blood pressure was measured three times by trained study personnel using calibrated instruments; the first measurement was discarded and the latter two were averaged. Venous blood was drawn fasting and 30 minutes, 1 hour, and 2 hours after an oral glucose load of 1.75 g per kg body weight (maximum 75 g) and sent to a central laboratory for analysis. Fasting serum cholesterol levels were measured with direct enzymatic methods (Beckman AU5800), with total and within-run coefficients of variation of <3 percent. Fasting and post-load glucose levels were measured enzymatically and hemoglobin A1C was measured with standard methods (Beckman Coulter SYNCHRON LX); quality control data have been reported.<sup>1</sup> For the present analysis, only fasting and 2-hour post-load glucose levels were utilized (**Table 1**). Medical diagnoses (including diabetes) and medication use were collected from the mother via questionnaire.

### Statistical Analyses

We confirmed linearity assumptions for the CVH score exposure by (1) visually inspecting plots of the natural log-odds of categorical outcome variables against the continuous CVH exposure and scatterplots of residuals versus fitted values for the continuous outcome variable (all appeared linear), and (2) estimating restricted cubic splines (using the rms R software packages) by fitting Model 2 for the child 2 or more poor (vs all ideal) metrics outcome with a spline term for CVH score with 3, 4, and 5 knots set at equally spaced quantiles (Wald chi-square statistic confirmed lack of statistical significance for the spline term).

### Secondary Analyses

First, we sought to determine whether significant maternal-child total CVH associations were driven by any single maternal or child CVH metric. We repeated analyses using individual gestational CVH metrics (non-ideal [combined intermediate/poor] vs. ideal) as exposures and individual child CVH metrics (non-ideal vs. ideal) as outcomes. These analyses adjusted for all Model 2 covariates, and analyses with individual gestational CVH metrics as exposures also adjusted for the levels (non-ideal vs. ideal) of the other gestational CVH metrics.

Second, we sought to determine whether significant maternal-child CVH associations were fully explained by adverse pregnancy outcomes. If significant associations were found to be partly independent of adverse pregnancy outcomes, this would suggest that gestational CVH has clinical utility for identifying newborns at higher risk for poor CVH by early adolescence, even once pregnancy outcomes are known. To address this question, we added to Model 2 of our primary analyses three separate sets of categorical pregnancy and birth outcomes. The “clinical” set included factors that are typically available to a pediatrician and have well-established significant associations with later offspring cardiometabolic health: preeclampsia/eclampsia,<sup>2,4</sup> newborn low birthweight<sup>5</sup> (<2.5 kg; referent 2.5-4.5 kg), and macrosomia<sup>5</sup> (>4.5 kg; referent 2.5-4.5 kg). The “extended” set retained preeclampsia/eclampsia but also included more liberal thresholds for newborn birthweight categories and added other factors with less clinical availability or evidence basis. “Extended” variables included: preeclampsia/eclampsia, newborn small and large for gestational age (<10<sup>th</sup> and >90<sup>th</sup> percentile; referent 10<sup>th</sup>-90<sup>th</sup> percentile), sum of skinfolds >90<sup>th</sup> percentile (referent 10<sup>th</sup>-90<sup>th</sup> percentile), and cord blood insulin sensitivity index<sup>6-8</sup> <10<sup>th</sup> percentile (referent all others); percentiles were calculated within the entire HAPO cohort using quantile regression for newborn race-sex group with adjustment for gestational age, field center, and maternal parity.<sup>9,10</sup> The “comprehensive” set included factors in the “extended” set plus gestational hypertension and gestational diabetes; for this analysis, pregnant mothers with chronic hypertension (n=61) were excluded (since they were not at risk for gestational hypertension), and gestational CVH was characterized by only BMI, total cholesterol, and smoking status (since 28-week blood pressure and glucose were utilized to define gestational hypertension and diabetes).

### Sensitivity Analyses

We conducted four separate sensitivity analyses for the primary maternal-child CVH associations. First, we added terms for child Tanner stage and sex\*Tanner stage interaction to Model 2. The rationale was that CVH measures change with pubertal development; however, Tanner stage was not included in primary analyses since pubertal development could be on the causal pathway from gestational CVH to child CVH. Second, we excluded mothers who were underweight during pregnancy (BMI <22.6 kg/m<sup>2</sup>, based on HAPO regression analyses<sup>11</sup>) and children who were underweight at follow-up (based on International Obesity Task Force thresholds<sup>12</sup>); in primary analyses these mothers and children were classified as having “ideal” BMI, as the BMI metric in AHA-defined CVH focuses on excess weight.<sup>13</sup> Third, we used triglycerides as the lipid metric in gestational CVH, because although total cholesterol is the AHA-defined CVH lipid metric outside of pregnancy,<sup>13</sup> short-term newborn outcomes may be more associated with triglycerides.<sup>10</sup> Gestational triglyceride levels were defined as ideal if <220 mg/dL, intermediate if 220-299 mg/dL, and poor if ≥300 mg/dL, as done previously in HAPO (**Table 1**, footnote);<sup>10</sup> as with gestational total cholesterol, this produced a distribution of ideal, intermediate, and poor triglyceride levels similar to the distribution for BMI. Fourth, we utilized an alternative child glucose metric based on a composite of 3 indicators<sup>14</sup> (**Table 1**, footnote): fasting glucose (as in the primary analysis), hemoglobin A1C (ideal: <5.7%, intermediate: 5.7-6.4%, poor: ≥6.5%), and 2-hour post-load glucose (ideal: <140 mg/dL, intermediate: 140-199 mg/dL, poor: ≥200 mg/dL), because although fasting glucose is the AHA-defined CVH glucose metric, multi-indicator measures are more sensitive. The composite glycemia indicator was considered ideal if all 3 indicators were ideal, intermediate if any indicator was intermediate but none were poor, and poor if any indicator was poor.

## eResults

### Sensitivity Analyses

A total of 1,889 mother-offspring dyads with child Tanner stage data available were included in the first sensitivity analysis. Among these children, 438 (23.2%) were in Tanner stage 1, 917 (48.5%) were in stage 2/3, and 534 (28.3%) were in stage 4/5. After adding Tanner stage and sex\*Tanner stage interaction terms to Model 2 of the main analyses, associations between gestational CVH and offspring CVH were similar to those in the primary analysis, with some strengthening of point estimates but overlapping confidence intervals (**eFigures 1-5**).

After exclusion of 284 mothers who were underweight during pregnancy and 74 children who were underweight at age 10-14 years, 1,944 mother-offspring dyads were included in the second sensitivity analysis. Again, associations between gestational CVH and offspring CVH were similar to those in the primary analysis, with overlapping confidence intervals (**eFigures 1-5**).

A total of 2,286 dyads had maternal gestational triglyceride data available and were included in the third sensitivity analysis. Triglyceride levels were ideal in 1,462 (64.0%), intermediate in 568 (24.8%), and poor in 256 (11.2%) mothers during pregnancy. In contrast to gestational total cholesterol (**Figure 3** and **eTable 3**), gestational triglycerides did not demonstrate statistically significant associations with child total CVH categories after adjustment for the other CVH metrics (data not shown). When considering single child CVH metrics, a significant independent association with non-ideal (vs. ideal) gestational triglycerides was detected for child non-ideal (vs. ideal) blood pressure (RR 1.22, 95% CI 1.00-1.49; data not shown), but not for child non-ideal (vs. ideal) total cholesterol (RR 1.08, 95% CI 0.96-1.22; data not shown). Nevertheless, when triglycerides were substituted (instead of total cholesterol) as the gestational CVH lipid metric, associations of total gestational CVH with total offspring CVH were not meaningfully different from those in the primary analyses (**eFigures 1-5**).

A total of 1,997 dyads had data available for all 3 child glycemia indicators (fasting glucose, 2-hour post-load glucose, and hemoglobin A1C) and were included in the fourth sensitivity analysis. Glycemia indicators were all ideal among 1,620 (81.1%) children, 1 or more were intermediate but none were poor among 371 (18.6%) children, and at least 1 was poor among 6 (0.3%) children. Associations of gestational total CVH and single gestational CVH metrics with the child 3-indicator glycemia metric (data not shown) were similar to those with the child fasting glucose metric used in primary analyses (**Figure 3** and **eTable 3**). When the 3-indicator glycemia metric was utilized (instead of fasting glucose) in the definition of total child CVH, associations of total gestational CVH with total child CVH were not meaningfully different from those in the primary analyses (**eFigures 1-5**).

**eTable 1. Missing Data Among 2,302 Mother-Child Dyads in the Ancillary Study (Primary Analytic Sample)**

|                                                            | N (%) Missing Among 2,302 Dyads |                        |
|------------------------------------------------------------|---------------------------------|------------------------|
|                                                            | Mothers: During Pregnancy       | Children: At Follow-Up |
| Field center location                                      | 0                               |                        |
| Age at study exam                                          | 0                               | 1 (0.04)               |
| Gestational age at study exam                              | 0                               | ---                    |
| Parity at study exam                                       | 0                               | ---                    |
| Height at study exam                                       | 0                               | ---                    |
| Alcohol use at study exam                                  | 0                               | ---                    |
| Gestational age at delivery                                | 0                               |                        |
| Sex                                                        | ---                             | 0                      |
| Race/ethnicity                                             | 3 (0.1)                         |                        |
| Body mass index category at study exam                     | 0                               | 1 (0.04)               |
| Blood pressure category at study exam                      | 0                               | 8 (0.3)                |
| Total cholesterol category at study exam                   | 35 (1.5)                        | 92 (4.0)               |
| Glucose category at study exam                             | 0                               | 79 (3.4)               |
| Smoking category at study exam                             | 0                               | ---                    |
| Cardiovascular health at study exam <sup>a</sup>           | 35 (1.5)                        | 99 (4.3)               |
| Triglycerides category at study exam <sup>b</sup>          | 16 (0.7)                        | ---                    |
| Three-indicator glycemia metric at study exam <sup>b</sup> | 0                               | 305 (13.2)             |
| Tanner stage at study exam <sup>b</sup>                    | ---                             | 413 (17.9)             |

<sup>a</sup>Because of incomplete overlap in missingness of CVH scores between mothers and children, a total of 2,170 dyads had complete data for both maternal cardiovascular health during pregnancy and offspring cardiovascular health at follow-up.

<sup>b</sup>Data utilized only for sensitivity analysis.

**eTable 2. Adjusted<sup>a</sup> Associations of Maternal Gestational (Mean 28 Weeks' Gestation) Cardiovascular Health with Offspring Cardiovascular Health in Childhood**

|                                                                                                                     | Model 1 <sup>a</sup> | Model 2 <sup>b</sup> | Model 2 <sup>b</sup> +<br>"Clinical" <sup>c</sup><br>Pregnancy & Birth<br>Outcomes | Model 2 <sup>b</sup> +<br>"Extended" <sup>d</sup><br>Pregnancy & Birth<br>Outcomes | Model 2 <sup>b</sup> +<br>"Comprehensive" <sup>e</sup><br>Pregnancy & Birth<br>Outcomes |
|---------------------------------------------------------------------------------------------------------------------|----------------------|----------------------|------------------------------------------------------------------------------------|------------------------------------------------------------------------------------|-----------------------------------------------------------------------------------------|
| <b>Estimated Regression Coefficient (95% Confidence Interval) for Child Cardiovascular Health Score<sup>f</sup></b> |                      |                      |                                                                                    |                                                                                    |                                                                                         |
| Number in Model                                                                                                     | 2173                 | 2173                 | 2173                                                                               | 1714                                                                               | 1677                                                                                    |
| <b>Maternal Gestational CVH Variable</b>                                                                            |                      |                      |                                                                                    |                                                                                    |                                                                                         |
| All Ideal Metrics                                                                                                   | 0 (reference)        | 0 (reference)        | 0 (reference)                                                                      | 0 (reference)                                                                      | 0 (reference)                                                                           |
| 1 or More Intermediate (vs All Ideal) Metrics                                                                       | -0.19 (-0.33, -0.06) | -0.21 (-0.34, -0.08) | -0.21 (-0.34, -0.08)                                                               | -0.21 (-0.34, -0.08)                                                               | -0.21 (-0.34, -0.08)                                                                    |
| 1 Poor (vs All Ideal) Metrics                                                                                       | -0.46 (-0.60, -0.32) | -0.47 (-0.61, -0.33) | -0.47 (-0.61, -0.33)                                                               | -0.47 (-0.61, -0.33)                                                               | -0.47 (-0.61, -0.33)                                                                    |
| 2 or More Poor (vs All Ideal) Metrics                                                                               | -0.78 (-1.02, -0.54) | -0.81 (-1.05, -0.56) | -0.81 (-1.05, -0.56)                                                               | -0.81 (-1.05, -0.56)                                                               | -0.81 (-1.05, -0.56)                                                                    |
| Global P-value for categories <sup>g</sup>                                                                          | <.001                | <.001                | <.001                                                                              | <.001                                                                              | <.001                                                                                   |
| <b>Relative Risk (95% Confidence Interval) for Child All Ideal (vs Any Non-Ideal) Metrics</b>                       |                      |                      |                                                                                    |                                                                                    |                                                                                         |
| Number in Model                                                                                                     | 2174                 | 2174                 | 2174                                                                               | 1715                                                                               | 1678                                                                                    |
| <b>Maternal Gestational CVH Variable</b>                                                                            |                      |                      |                                                                                    |                                                                                    |                                                                                         |
| All Ideal Metrics                                                                                                   | 1.00 (reference)     | 1.00 (reference)     | 1.00 (reference)                                                                   | 1.00 (reference)                                                                   | 1.00 (reference)                                                                        |
| 1 or More Intermediate (vs All Ideal) Metrics                                                                       | 0.89 (0.78-1.004)    | 0.87 (0.77-0.99)     | 0.88 (0.77-0.99)                                                                   | 0.89 (0.77-1.03)                                                                   | 0.88 (0.76-1.01)                                                                        |
| 1 Poor (vs All Ideal) Metrics                                                                                       | 0.68 (0.59-0.78)     | 0.67 (0.58-0.77)     | 0.67 (0.58-0.78)                                                                   | 0.66 (0.55-0.78)                                                                   | 0.70 (0.58-0.84)                                                                        |
| 2 or More Poor (vs All Ideal) Metrics                                                                               | 0.64 (0.49-0.84)     | 0.63 (0.48-0.82)     | 0.63 (0.48-0.83)                                                                   | 0.67 (0.49-0.91)                                                                   | 0.67 (0.38-1.21)                                                                        |
| Global P-value for categories <sup>g</sup>                                                                          | <.001                | <.001                | <.001                                                                              | <.001                                                                              | .02                                                                                     |
| <b>Relative Risk (95% Confidence Interval) for Child 1 or More Intermediate (vs All Ideal) Metrics</b>              |                      |                      |                                                                                    |                                                                                    |                                                                                         |
| Number in Model                                                                                                     | 1601                 | 1601                 | 1601                                                                               | 1251                                                                               | 1234                                                                                    |
| <b>Maternal Gestational CVH Variable</b>                                                                            |                      |                      |                                                                                    |                                                                                    |                                                                                         |
| All Ideal Metrics                                                                                                   | 1.00 (reference)     | 1.00 (reference)     | 1.00 (reference)                                                                   | 1.00 (reference)                                                                   | 1.00 (reference)                                                                        |
| 1 or More Intermediate (vs All Ideal) Metrics                                                                       | 1.06 (0.94-1.21)     | 1.07 (0.95-1.22)     | 1.08 (0.95-1.22)                                                                   | 1.06 (0.92-1.22)                                                                   | 1.06 (0.93-1.21)                                                                        |
| 1 Poor (vs All Ideal) Metrics                                                                                       | 1.25 (1.10-1.41)     | 1.26 (1.11-1.43)     | 1.26 (1.11-1.43)                                                                   | 1.27 (1.10-1.46)                                                                   | 1.16 (1.00-1.35)                                                                        |
| 2 or More Poor (vs All Ideal) Metrics                                                                               | 1.13 (0.89-1.44)     | 1.15 (0.90-1.47)     | 1.16 (0.91-1.49)                                                                   | 0.99 (0.70-1.40)                                                                   | 0.93 (0.45-1.92)                                                                        |
| Global P-value for categories <sup>g</sup>                                                                          | .09                  | .09                  | .09                                                                                | .13                                                                                | .60                                                                                     |
| <b>Relative Risk (95% Confidence Interval) for Child 1 Poor (vs All Ideal) Metrics</b>                              |                      |                      |                                                                                    |                                                                                    |                                                                                         |
| Number in Model                                                                                                     | 1284                 | 1284                 | 1284                                                                               | 1007                                                                               | 983                                                                                     |
| <b>Maternal Gestational CVH Variable</b>                                                                            |                      |                      |                                                                                    |                                                                                    |                                                                                         |
| All Ideal Metrics                                                                                                   | 1.00 (reference)     | 1.00 (reference)     | 1.00 (reference)                                                                   | 1.00 (reference)                                                                   | 1.00 (reference)                                                                        |
| 1 or More Intermediate (vs All Ideal) Metrics                                                                       | 1.15 (0.95-1.40)     | 1.17 (0.96-1.42)     | 1.16 (0.95-1.41)                                                                   | 1.17 (0.94-1.46)                                                                   | 1.19 (0.97-1.47)                                                                        |
| 1 Poor (vs All Ideal) Metrics                                                                                       | 1.62 (1.35-1.93)     | 1.66 (1.39-1.99)     | 1.66 (1.39-1.99)                                                                   | 1.68 (1.37-2.06)                                                                   | 1.75 (1.43-2.14)                                                                        |
| 2 or More Poor (vs All Ideal) Metrics                                                                               | 1.93 (1.49-2.51)     | 2.02 (1.55-2.64)     | 2.01 (1.54-2.63)                                                                   | 2.04 (1.51-2.77)                                                                   | 2.14 (1.29-3.58)                                                                        |
| Global P-value for categories <sup>g</sup>                                                                          | <.001                | <.001                | <.001                                                                              | <.001                                                                              | <.001                                                                                   |

|                                                                                                | Model 1 <sup>a</sup> | Model 2 <sup>b</sup> | Model 2 <sup>b</sup> +<br>“Clinical” <sup>c</sup><br>Pregnancy & Birth<br>Outcomes | Model 2 <sup>b</sup> +<br>“Extended” <sup>d</sup><br>Pregnancy & Birth<br>Outcomes | Model 2 <sup>b</sup> +<br>“Comprehensive” <sup>e</sup><br>Pregnancy & Birth<br>Outcomes |
|------------------------------------------------------------------------------------------------|----------------------|----------------------|------------------------------------------------------------------------------------|------------------------------------------------------------------------------------|-----------------------------------------------------------------------------------------|
| <b>Relative Risk (95% Confidence Interval) for Child 2 or More Poor (vs All Ideal) Metrics</b> |                      |                      |                                                                                    |                                                                                    |                                                                                         |
| <b>Number in Model</b>                                                                         | 909                  | 909                  | 909                                                                                | 713                                                                                | 697                                                                                     |
| <b>Maternal Gestational CVH Variable</b>                                                       |                      |                      |                                                                                    |                                                                                    |                                                                                         |
| <b>All Ideal Metrics</b>                                                                       | 1.00 (reference)     | 1.00 (reference)     | 1.00 (reference)                                                                   | 1.00 (reference)                                                                   | 1.00 (reference)                                                                        |
| <b>1 or More Intermediate (vs All Ideal) Metrics</b>                                           | 2.04 (1.17-3.56)     | 2.15 (1.23-3.75)     | 2.03 (1.16-3.54)                                                                   | 1.90 (1.06-3.43)                                                                   | 1.90 (1.12-3.23)                                                                        |
| <b>1 Poor (vs All Ideal) Metrics</b>                                                           | 3.20 (1.90-5.49)     | 3.32 (1.96-5.62)     | 3.16 (1.85-5.40)                                                                   | 2.67 (1.53-4.66)                                                                   | 2.98 (1.70-5.23)                                                                        |
| <b>2 or More Poor (vs All Ideal) Metrics</b>                                                   | 6.19 (3.31-11.60)    | 7.82 (4.12-14.85)    | 6.49 (3.31-12.75)                                                                  | 6.23 (3.03-12.82)                                                                  | 4.92 (1.41-17.18)                                                                       |
| <b>Global P-value for categories<sup>g</sup></b>                                               | <.001                | <.001                | <.001                                                                              | <.001                                                                              | .004                                                                                    |

<sup>a</sup>Model 1 covariates include field center (each with a high level of demographic homogeneity) and child sex and age at follow-up.

<sup>b</sup>Model 2 includes Model 1 covariates plus maternal variables during the pregnancy exam, including age, height, parity, alcohol use, and gestational age.

<sup>c</sup>“Clinical” pregnancy and birth outcomes include: low birthweight (<2.5 kg; referent 2.5-4.5 kg), macrosomia (>4.5 kg; referent 2.5-4.5 kg), and preeclampsia/eclampsia.

<sup>d</sup>“Extended” pregnancy and birth outcomes include: small for gestational age (<10<sup>th</sup> percentile; referent 10<sup>th</sup>-90<sup>th</sup> percentile), large for gestational age (>90<sup>th</sup> percentile; referent 10<sup>th</sup>-90<sup>th</sup> percentile), preeclampsia/eclampsia, sum of skinfolds >90<sup>th</sup> percentile (referent 10<sup>th</sup>-90<sup>th</sup> percentile), and cord blood insulin sensitivity index <10<sup>th</sup> percentile (referent all others). All percentiles were based on quantile regression for newborn race-sex group with adjustment for field center, gestational age, race/ethnicity, and maternal parity among the entire HAPO cohort; see Methods and eMethods for details.

<sup>e</sup>“Comprehensive” pregnancy and birth outcomes include: preeclampsia/eclampsia, gestational hypertension, gestational diabetes mellitus, newborn small for gestational age, large for gestational age, sum of skinfolds >90<sup>th</sup> percentile, and cord blood insulin sensitivity index <10<sup>th</sup> percentile; see footnote for “Extended” set, Methods, and eMethods for details on newborn outcome definitions. For this analysis, 61 mothers with chronic hypertension were excluded and gestational CVH was defined by the combination of only body mass index, total cholesterol, and smoking status; see Methods and eMethods for details.

<sup>f</sup>Child CVH score range is 0-8 points possible. For most analyses, maternal gestational CVH score range is 0-10 points possible, except when adjusting for “Comprehensive” Pregnancy & Birth Outcomes, the maternal gestational CVH score range is 0-6 points possible because gestational blood pressure and glucose are not part of the CVH definition. See Methods and eMethods for details.

<sup>g</sup>The global P-value is from a 3-df omnibus test comparing the log likelihood of the model with the categorical CVH variable to that without it.

CVH, cardiovascular health.

**eTable 3. Adjusted Associations between Individual Metrics of Maternal Gestational Cardiovascular Health and Offspring Childhood Cardiovascular Health**

| Maternal Gestational CVH Variable                                 | N (%) of Mothers with CVH Status | Adjusted <sup>a</sup> Relative Risk (95% CI) for Child Cardiovascular Health Status        |                                               |                                        |                                       |
|-------------------------------------------------------------------|----------------------------------|--------------------------------------------------------------------------------------------|-----------------------------------------------|----------------------------------------|---------------------------------------|
|                                                                   |                                  | All Ideal (vs Any Non-Ideal) Metrics                                                       | 1 or More Intermediate (vs All Ideal) Metrics | 1 Poor (vs All Ideal) Metrics          | 2 or More Poor (vs All Ideal) Metrics |
| <b>N (%) of Children with CVH Status</b>                          | ---                              | 821 (37.3)                                                                                 | 801 (36.3)                                    | 482 (21.9)                             | 100 (4.5)                             |
| <b>Gestational CVH Metric with Non-Ideal (vs Ideal) Status</b>    |                                  |                                                                                            |                                               |                                        |                                       |
| <b>Body Mass Index</b>                                            | 834 (36.2)                       | 0.73 (0.64-0.83)                                                                           | 1.12 (0.998-1.26)                             | 1.63 (1.40-1.91)                       | 2.61 (1.70-4.01)                      |
| <b>Blood Pressure</b>                                             | 303 (13.2)                       | 0.78 (0.64-0.95)                                                                           | 1.14 (0.98-1.32)                              | 1.25 (1.04-1.50)                       | 2.43 (1.59-3.71)                      |
| <b>Total Cholesterol</b>                                          | 822 (36.3)                       | 0.89 (0.80-0.999)                                                                          | 1.06 (0.96-1.18)                              | 1.16 (1.001-1.34)                      | 1.51 (1.05-2.21)                      |
| <b>Glucose</b>                                                    | 287 (12.5)                       | 0.85 (0.70-1.03)                                                                           | 1.17 (1.02-1.35)                              | 1.07 (0.88-1.30)                       | 1.41 (0.88-2.27)                      |
| <b>Smoking</b>                                                    | 94 (4.1)                         | 0.88 (0.68-1.15)                                                                           | 1.21 (0.93-1.57)                              | 1.09 (0.71-1.66)                       | 0.52 (0.10-2.72)                      |
| <b>Maternal Gestational CVH Variable</b>                          |                                  |                                                                                            |                                               |                                        |                                       |
| Maternal Gestational CVH Variable                                 | N (%) of Mothers with CVH Status | Adjusted <sup>a</sup> Relative Risk (95% CI) for Child Cardiovascular Health Metric Status |                                               |                                        |                                       |
|                                                                   |                                  | Non-Ideal (vs Ideal) Body Mass Index                                                       | Non-Ideal (vs Ideal) Blood Pressure           | Non-Ideal (vs Ideal) Total Cholesterol | Non-Ideal (vs Ideal) Fasting Glucose  |
| <b>N (%) of Children with CVH Metric Status</b>                   | ---                              | 770 (33.5)                                                                                 | 380 (16.6)                                    | 771 (34.9)                             | 169 (7.6)                             |
| <b>Gestational CVH Score, per 1 Point Higher (More Favorable)</b> | ---                              | 0.86 (0.82-0.89)                                                                           | 0.90 (0.84-0.96)                              | 0.92 (0.88-0.96)                       | 0.89 (0.80-0.98)                      |
| <b>Gestational CVH Category (versus All Ideal Metrics)</b>        |                                  |                                                                                            |                                               |                                        |                                       |
| <b>1 or More Intermediate Metrics</b>                             | 719 (31.7)                       | 1.29 (1.10-1.51)                                                                           | 0.95 (0.75-1.21)                              | 1.15 (0.997-1.34)                      | 1.17 (0.81-1.67)                      |
| <b>1 Poor Metrics</b>                                             | 669 (29.5)                       | 1.49 (1.27-1.73)                                                                           | 1.17 (0.92-1.48)                              | 1.40 (1.22-1.62)                       | 1.17 (0.81-1.69)                      |
| <b>2 or More Poor Metrics</b>                                     | 137 (6.0)                        | 2.09 (1.71-2.55)                                                                           | 1.34 (0.91-1.97)                              | 1.16 (0.88-1.53)                       | 1.85 (1.04-3.28)                      |
| <b>Gestational CVH Metric with Non-Ideal (vs Ideal) Status</b>    |                                  |                                                                                            |                                               |                                        |                                       |
| <b>Body Mass Index</b>                                            | 834 (36.2)                       | 1.83 (1.62-2.08)                                                                           | 1.36 (1.11-1.67)                              | 1.01 (0.89-1.15)                       | 1.31 (0.96-1.80)                      |
| <b>Blood Pressure</b>                                             | 303 (13.2)                       | 1.20 (1.05-1.38)                                                                           | 1.41 (1.11-1.78)                              | 1.03 (0.86-1.23)                       | 0.86 (0.55-1.34)                      |
| <b>Total Cholesterol</b>                                          | 822 (36.3)                       | 0.93 (0.82-1.05)                                                                           | 0.99 (0.81-1.20)                              | 1.38 (1.23-1.54)                       | 1.31 (0.97-1.75)                      |
| <b>Glucose</b>                                                    | 287 (12.5)                       | 1.10 (0.95-1.28)                                                                           | 1.08 (0.83-1.41)                              | 1.18 (1.00-1.39)                       | 1.55 (1.08-2.21)                      |
| <b>Smoking</b>                                                    | 94 (4.1)                         | 1.17 (0.87-1.57)                                                                           | 0.76 (0.43-1.34)                              | 1.09 (0.74-1.59)                       | 0.61 (0.20-1.87)                      |

<sup>a</sup>All estimates are adjusted for field center (each with a high level of demographic homogeneity); child sex and age at follow-up; maternal variables during the pregnancy exam, including age, height, parity, alcohol use, and gestational age; as well as levels (ideal versus non-ideal [intermediate/poor]) of each of the other four gestational CVH metrics (except when total gestational CVH is the exposure). CI, confidence interval; CVH, cardiovascular health.

**eFigure 1. Sensitivity Analyses of Associations of Maternal Gestational Cardiovascular Health with Offspring Cardiovascular Health Score in Childhood**

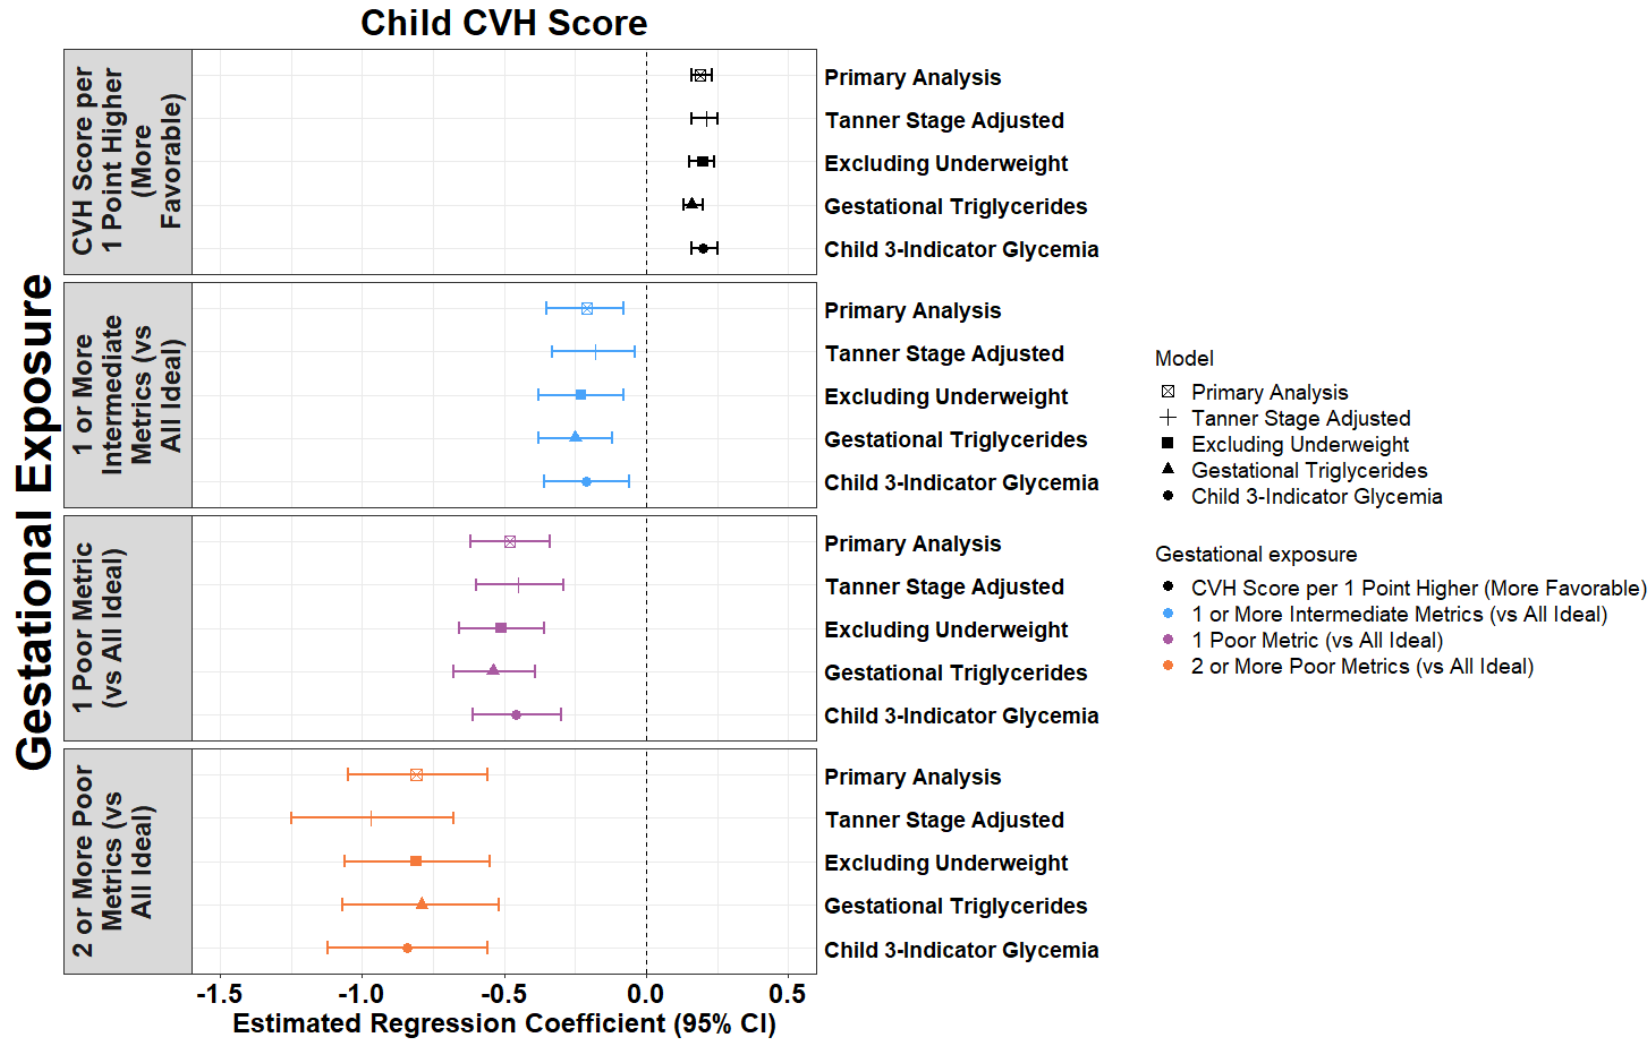

Estimates in all models were adjusted for field center (each with a high level of demographic homogeneity), child sex and age at follow-up, and maternal variables during the pregnancy exam, including age, height, parity, alcohol use, and gestational age. Models are as follows. "Primary" indicates estimates from the main analysis (i.e., Model 2 from eTable 2) for comparison with sensitivity analyses. "Tanner Stage-Adjusted" indicates estimates additionally adjusted for child Tanner stage and sex\* Tanner stage at follow-up. "Excluding Underweight" indicates estimates that excluded mothers who were underweight during pregnancy and children who were underweight at follow-up. "Gestational Triglycerides" indicates estimates based on a maternal gestational CVH definition substituting triglycerides for total cholesterol as the lipid metric. "Child 3-Indicator Glycemia" indicates estimates based on a child CVH definition substituting the 3-indicator glycemia variable for fasting glucose as the child glycemia metric. See Methods and eMethods for details. The CVH score range is 0-10 points for maternal gestational CVH and 0-8 points for child CVH. CI, confidence interval; CVH, cardiovascular health.



**eFigure 2. Sensitivity Analyses of Associations of Maternal Gestational Cardiovascular Health with Offspring All Ideal (versus Any Non-Ideal) Cardiovascular Health Metrics in Childhood**

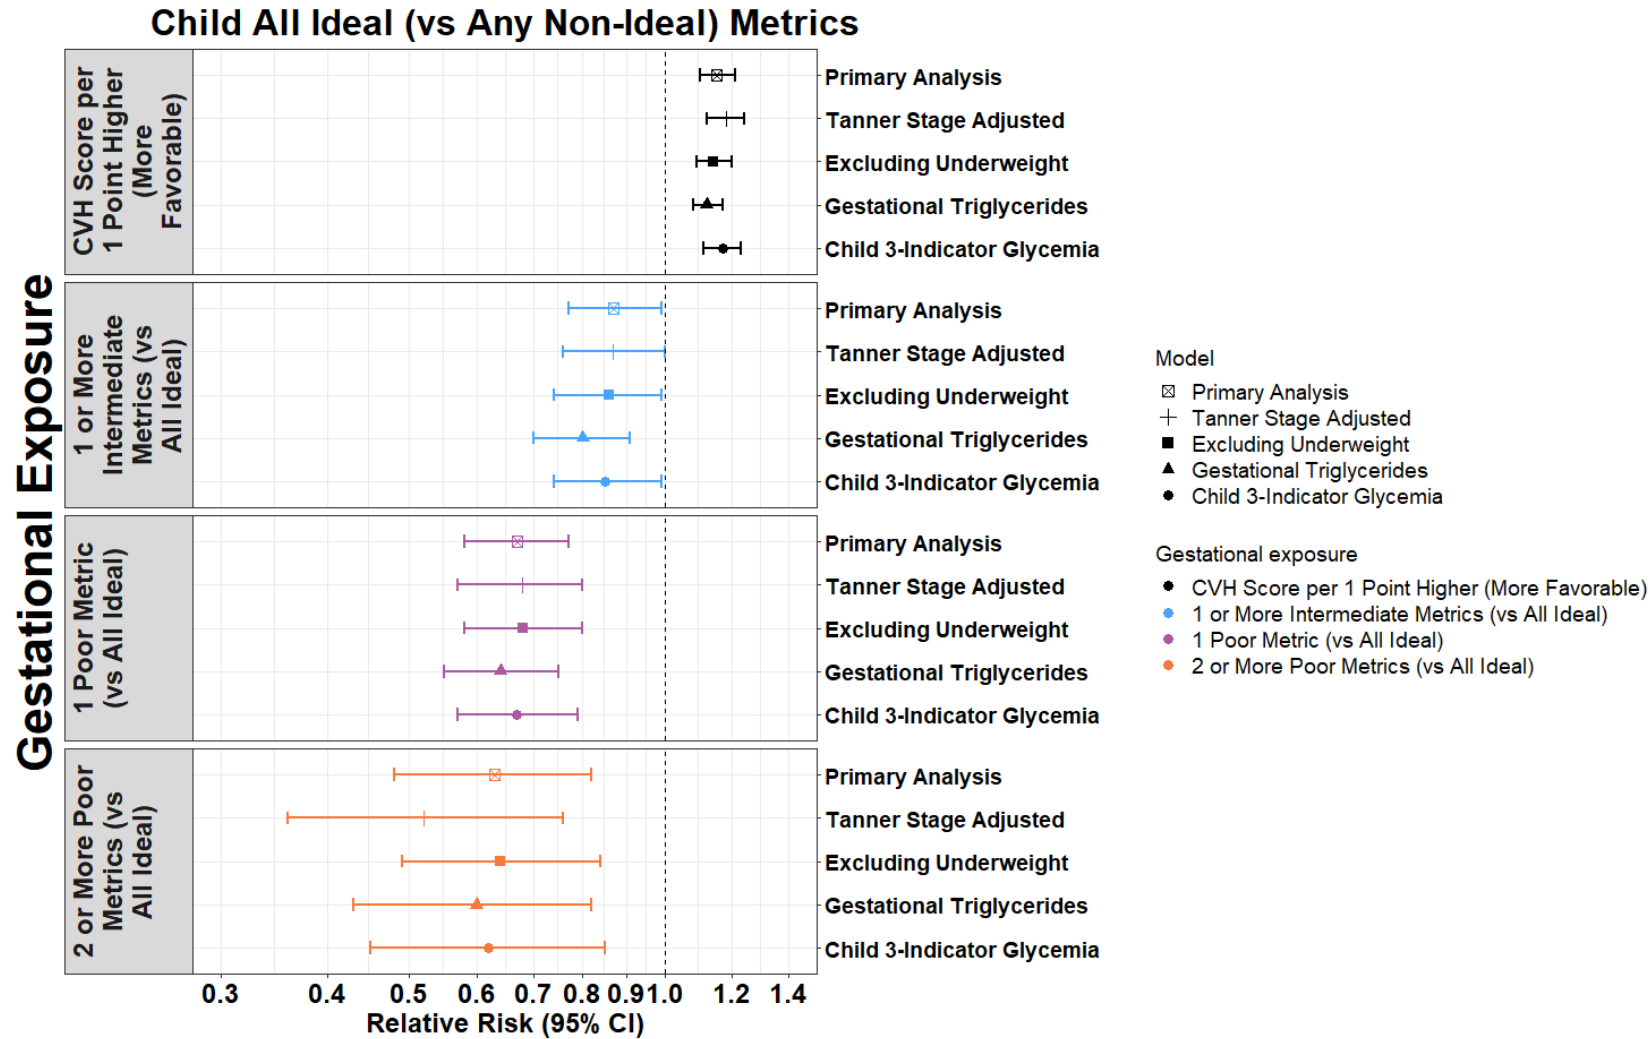

Estimates in all models were adjusted for field center (each with a high level of demographic homogeneity), child sex and age at follow-up, and maternal variables during the pregnancy exam, including age, height, parity, alcohol use, and gestational age. Models are as follows. "Primary" indicates estimates from the main analysis (i.e., Model 2 from eTable 2) for comparison with sensitivity analyses. "Tanner Stage-Adjusted" indicates estimates additionally adjusted for child Tanner stage and sex\* Tanner stage at follow-up. "Excluding Underweight" indicates estimates that excluded mothers who were underweight during pregnancy and children who were underweight at follow-up. "Gestational Triglycerides" indicates estimates based on a maternal gestational CVH definition substituting triglycerides for total cholesterol as the lipid metric. "Child 3-Indicator Glycemia" indicates estimates based on a child CVH definition substituting the 3-indicator glycemia variable for fasting glucose as the child glycemia metric. See Methods and eMethods for details. The CVH score range is 0-10 points for maternal gestational CVH and 0-8 points for child CVH. CI, confidence interval; CVH, cardiovascular health.

**eFigure 3. Sensitivity Analyses of Associations of Maternal Gestational Cardiovascular Health with Offspring 1 or More Intermediate (versus All Ideal) Cardiovascular Health Metrics in Childhood**

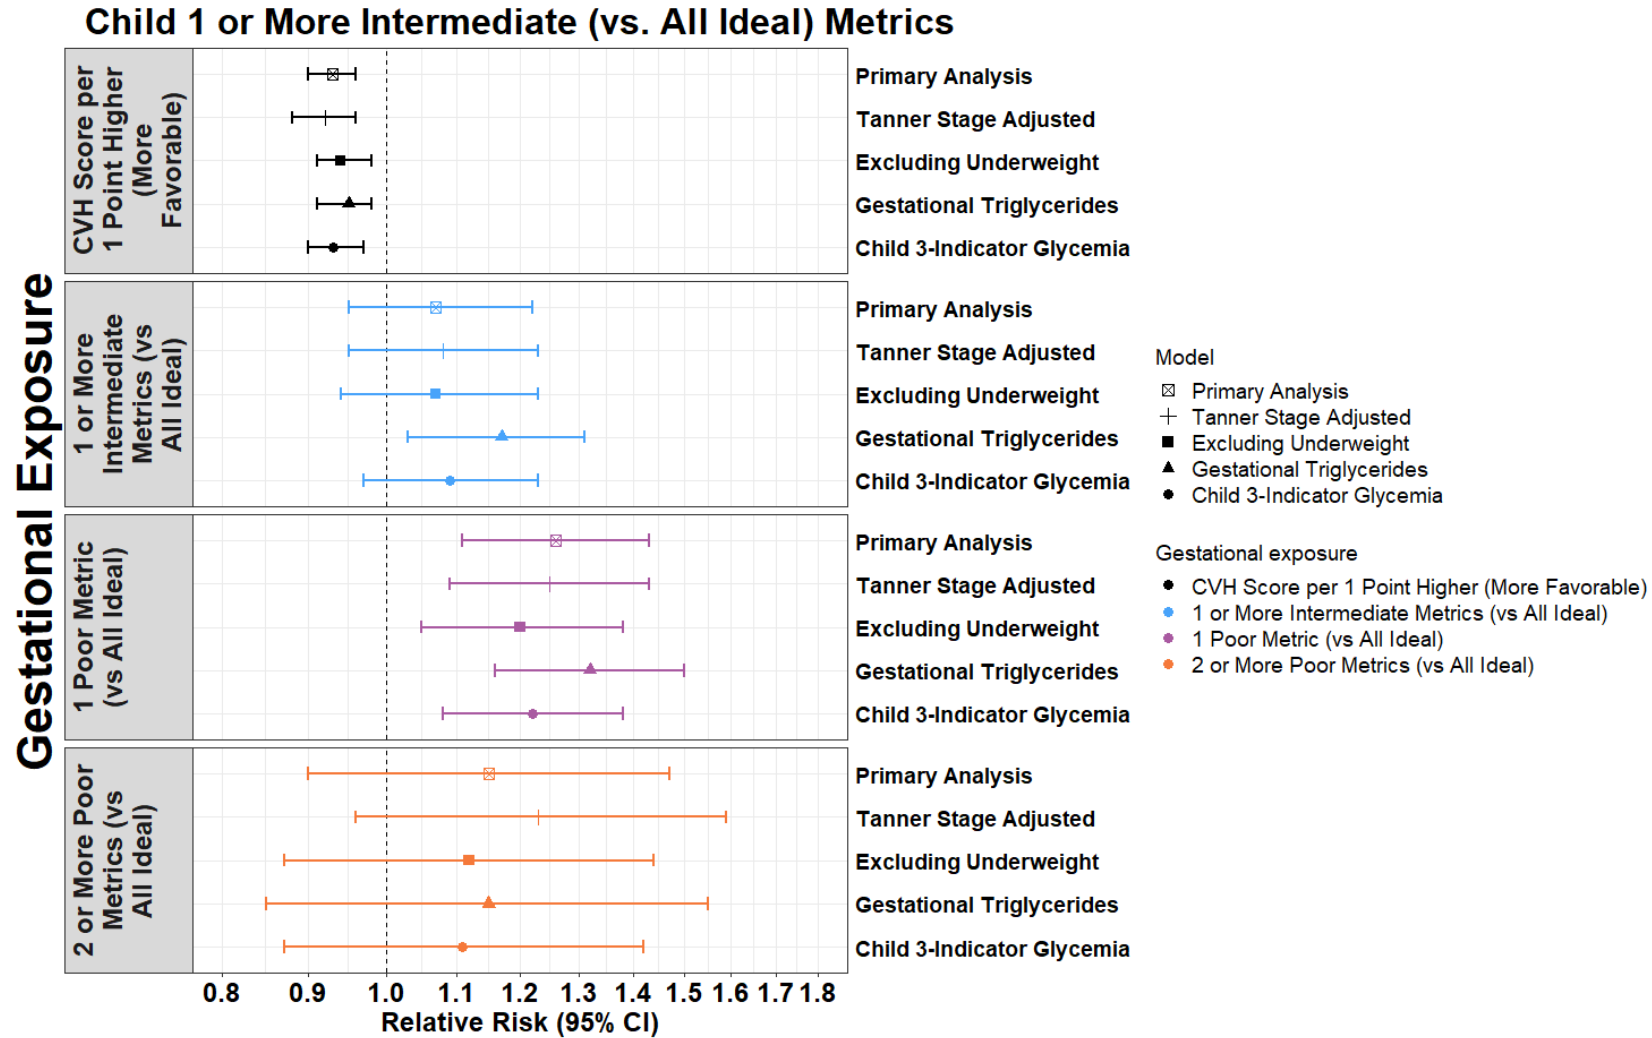

Estimates in all models were adjusted for field center (each with a high level of demographic homogeneity), child sex and age at follow-up, and maternal variables during the pregnancy exam, including age, height, parity, alcohol use, and gestational age. Models are as follows. "Primary" indicates estimates from the main analysis (i.e., Model 2 from eTable 2) for comparison with sensitivity analyses. "Tanner Stage-Adjusted" indicates estimates additionally adjusted for child Tanner stage and sex\* Tanner stage at follow-up. "Excluding Underweight" indicates estimates that excluded mothers who were underweight during pregnancy and children who were underweight at follow-up. "Gestational Triglycerides" indicates estimates based on a maternal gestational CVH definition substituting triglycerides for total cholesterol as the lipid metric. "Child 3-Indicator Glycemia" indicates estimates based on a child CVH definition substituting the 3-indicator glycemia variable for fasting glucose as the child glycemia metric. See Methods and eMethods for details. The CVH score range is 0-10 points for maternal gestational CVH and 0-8 points for child CVH. CI, confidence interval; CVH, cardiovascular health.

**eFigure 4. Sensitivity Analyses of Associations of Maternal Gestational Cardiovascular Health with Offspring 1 Poor (versus All Ideal) Cardiovascular Health Metric in Childhood**

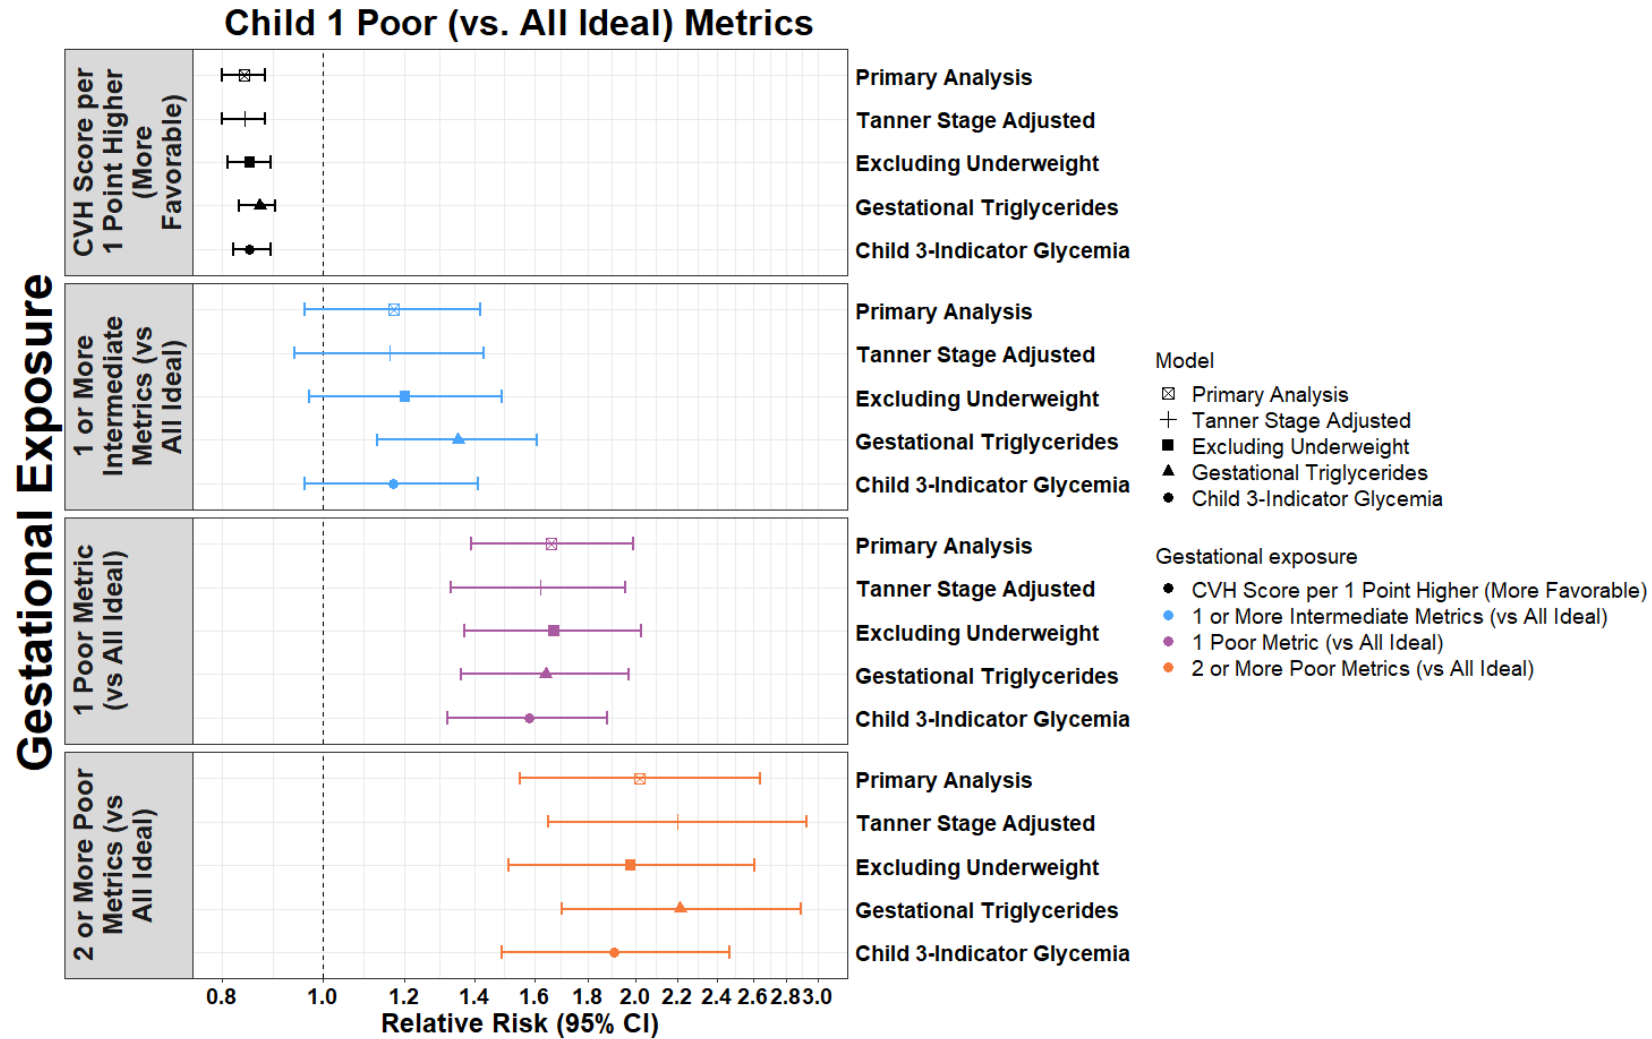

Estimates in all models were adjusted for field center (each with a high level of demographic homogeneity), child sex and age at follow-up, and maternal variables during the pregnancy exam, including age, height, parity, alcohol use, and gestational age. Models are as follows. "Primary" indicates estimates from the main analysis (i.e., Model 2 from eTable 2) for comparison with sensitivity analyses. "Tanner Stage-Adjusted" indicates estimates additionally adjusted for child Tanner stage and sex\* Tanner stage at follow-up. "Excluding Underweight" indicates estimates that excluded mothers who were underweight during pregnancy and children who were underweight at follow-up. "Gestational Triglycerides" indicates estimates based on a maternal gestational CVH definition substituting triglycerides for total cholesterol as the lipid metric. "Child 3-Indicator Glycemia" indicates estimates based on a child CVH definition substituting the 3-indicator glycemia variable for fasting glucose as the child glycemia metric. See Methods and eMethods for details. The CVH score range is 0-10 points for maternal gestational CVH and 0-8 points for child CVH. CI, confidence interval; CVH, cardiovascular health.

**eFigure 5. Sensitivity Analyses of Associations of Maternal Gestational Cardiovascular Health with Offspring 2 or More Poor (versus All Ideal) Cardiovascular Health Metrics in Childhood**

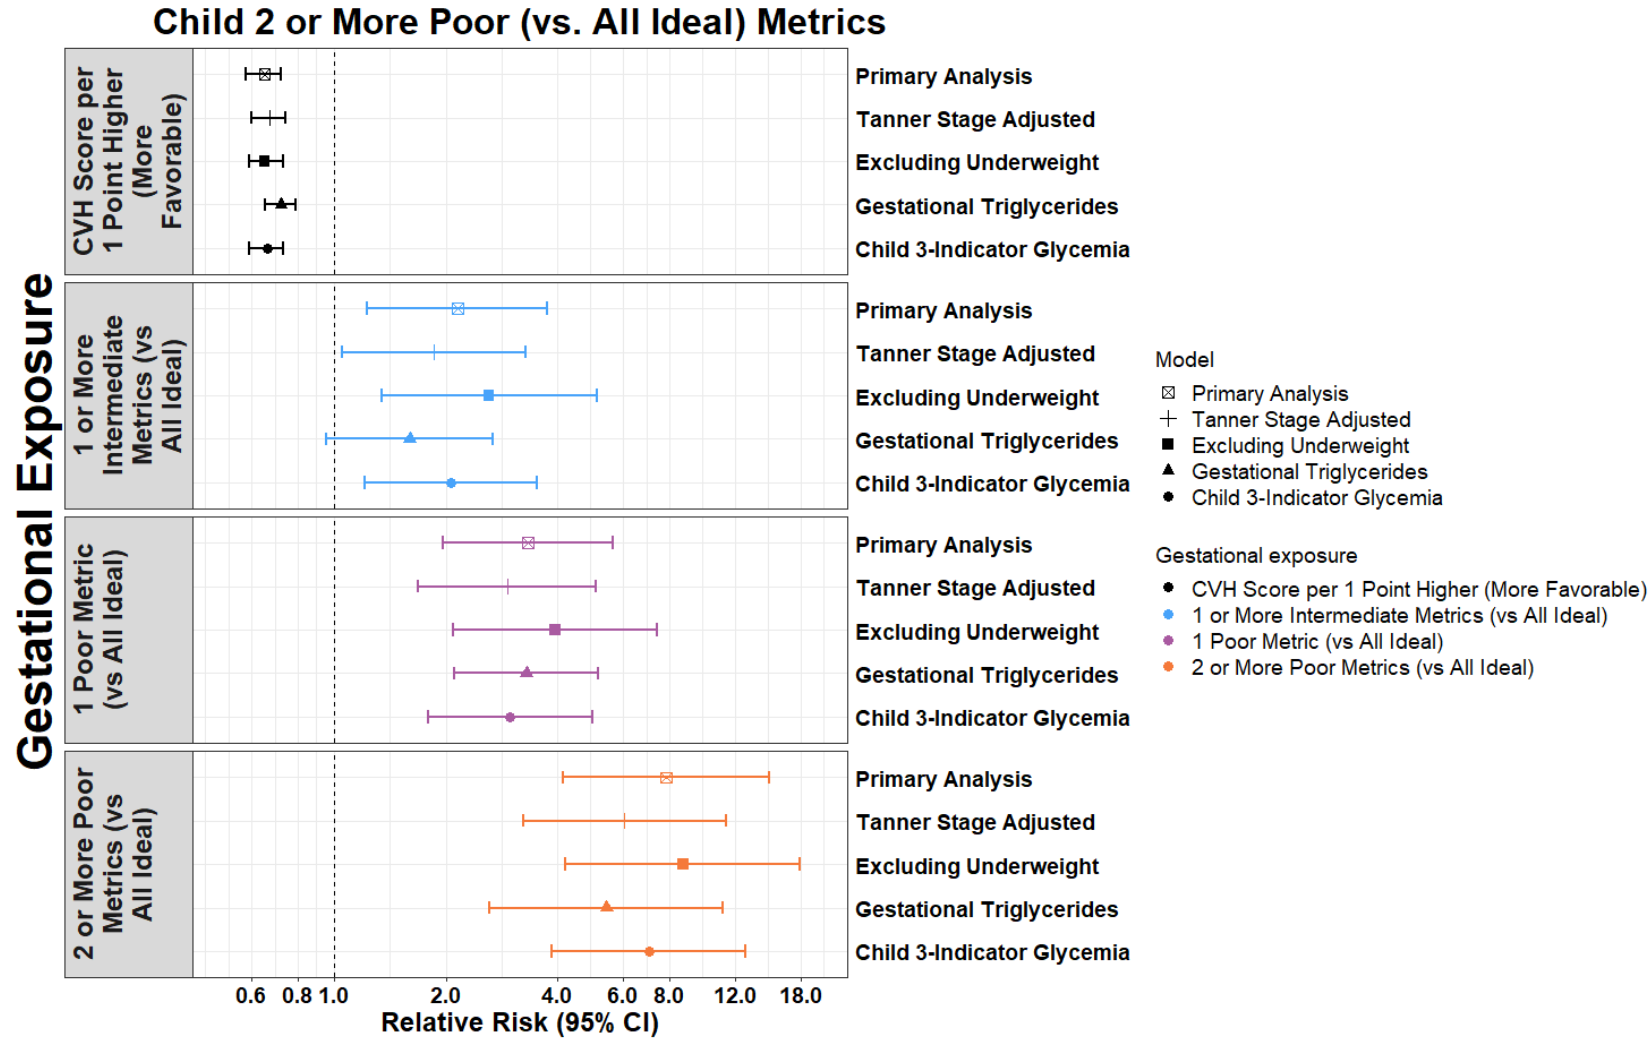

Estimates in all models were adjusted for field center (each with a high level of demographic homogeneity), child sex and age at follow-up, and maternal variables during the pregnancy exam, including age, height, parity, alcohol use, and gestational age. Models are as follows. "Primary" indicates estimates from the main analysis (i.e., Model 2 from eTable 2) for comparison with sensitivity analyses. "Tanner Stage-Adjusted" indicates estimates additionally adjusted for child Tanner stage and sex\* Tanner stage at follow-up. "Excluding Underweight" indicates estimates that excluded mothers who were underweight during pregnancy and children who were underweight at follow-up. "Gestational Triglycerides" indicates estimates based on a maternal gestational CVH definition substituting triglycerides for total cholesterol as the lipid metric. "Child 3-Indicator Glycemia" indicates estimates based on a child CVH definition substituting the 3-indicator glycemia variable for fasting glucose as the child glycemia metric. See Methods and eMethods for details. The CVH score range is 0-10 points for maternal gestational CVH and 0-8 points for child CVH. CI, confidence interval; CVH, cardiovascular health.

## eReferences

1. Scholtens DM, Kuang A, Lowe LP, et al. Hyperglycemia and Adverse Pregnancy Outcome Follow-up Study (HAPO FUS): Maternal Glycemia and Childhood Glucose Metabolism. *Diabetes Care*. 2019;42(3):381-392.
2. Andraweera PH, Lassi ZS. Cardiovascular Risk Factors in Offspring of Preeclamptic Pregnancies-Systematic Review and Meta-Analysis. *J Pediatr*. 2019;208:104-113 e106.
3. Hammad IA, Meeks H, Fraser A, et al. Risks of cause-specific mortality in offspring of pregnancies complicated by hypertensive disease of pregnancy. *Am J Obstet Gynecol*. 2020;222(1):75 e71-75 e79.
4. Nahum Sacks K, Friger M, Shoham-Vardi I, et al. Prenatal exposure to preeclampsia as an independent risk factor for long-term cardiovascular morbidity of the offspring. *Pregnancy Hypertens*. 2018;13:181-186.
5. Knop MR, Geng TT, Gorny AW, et al. Birth Weight and Risk of Type 2 Diabetes Mellitus, Cardiovascular Disease, and Hypertension in Adults: A Meta-Analysis of 7 646 267 Participants From 135 Studies. *J Am Heart Assoc*. 2018;7(23):e008870.
6. Okura T, Nakamura R, Fujioka Y, et al. CPR-IR is an insulin resistance index that is minimally affected by hepatic insulin clearance. *PLoS one*. 2018;13(5):e0197663.
7. Ohkura T, Shiochi H, Fujioka Y, et al. 20/(fasting C-peptide x fasting plasma glucose) is a simple and effective index of insulin resistance in patients with type 2 diabetes mellitus. *Cardiovasc Diabetol*. 2013;12:21.
8. Catalano PM, Presley L, Minium J, Hauguel-de Mouzon S. Fetuses of obese mothers develop insulin resistance in utero. *Diabetes Care*. 2009;32(6):1076-1080.
9. Group HSCR, Metzger BE, Lowe LP, et al. Hyperglycemia and adverse pregnancy outcomes. *New Engl J Med*. 2008;358(19):1991-2002.
10. Perak AM, Lancki N, Kuang A, et al. Associations of Gestational Cardiovascular Health with Pregnancy Outcomes [published online ahead of print (Aug 5, 2020)]. *Am J Obstet Gynecol*. 2020:S0002-9378(20)30828-0.
11. HAPO Study Cooperative Research Group. Hyperglycaemia and Adverse Pregnancy Outcome (HAPO) Study: associations with maternal body mass index. *BJOG*. 2010;117(5):575-584.
12. Cole TJ, Lobstein T. Extended international (IOTF) body mass index cut-offs for thinness, overweight and obesity. *Pediatr Obes*. 2012;7(4):284-294.
13. Lloyd-Jones DM, Hong Y, Labarthe D, et al. Defining and setting national goals for cardiovascular health promotion and disease reduction. *Circulation*. 2010;121(4):586-613.
14. American Diabetes Association. 2. Classification and Diagnosis of Diabetes: Standards of Medical Care in Diabetes-2020. *Diabetes Care*. 2020;43(Suppl 1):S14-S31.

## **eAppendix.** HAPO Follow-Up Study Cooperative Research Group Members

### **Field Centers:**

**Bangkok:** Chaicharn Deerochanawong, Thadchanan Tanaphonpoonsuk (Rajavithi Hospital), Sukeeta Binratkaew Uraivan Chotigeat, Wanee Manyam, (Queen Sirikit National Institute of Child Health)

**Barbados:** Martinette Forde, Andre Greenidge, Kathleen Neblett, Paula Michele Lashley, Desiree Walcott (Queen Elizabeth Hospital/School of Clinical Medicine and Research, University of the West Indies, Barbados)

**Belfast:** Katie Corry, Loraine Francis, Jo-anne Irwin, Anne Langan, David R McCance, Maureen Mousavi, (Belfast Health and Social Care Trust), Ian Young (Queen's University Belfast)

**Bellflower:** Jennifer Gutierrez, Jennifer Jimenez, Jean M Lawrence, David A Sacks, Harpreet S Takhar, Elizabeth Tanton (Kaiser Permanente Southern California)

**Chicago:** Wendy J Brickman, Jennifer Howard, Jami L Josefson, Lauren Miller (Ann and Robert H Lurie Children's Hospital/Northwestern University Feinberg School of Medicine)

**Cleveland:** Jacqui Bjaloncik, Patrick M Catalano, Ajuah Davis, Michaela Koontz, Lorraine Presley, Shoi Smith, Amanda Tyhulski (MetroHealth Medical Center/Case Western Reserve University)

**Hong Kong:** Albert Martin Li, Ronald C Ma, Risa Ozaki, Wing Hung Tam, Michelle Wong, Cindy Siu Man Yuen (The Chinese University of Hong Kong/Prince of Wales Hospital)

**Manchester:** Peter E Clayton, Aysha Khan, Avni Vyas (Royal Manchester Children's Hospital, Central Manchester University Hospitals NHS Foundation Trust, Manchester Academic Health Sciences Centre/School of Medical Sciences, Faculty of Biology, Medicine & Health, University of Manchester), Michael Maresh (St. Mary's Hospital, Central Manchester University Hospitals NHS Foundation Trust, Manchester Academic Health Sciences Centre)

**Petah-Tiqva:** Hadasse Benzaquen, Naama Glickman, Alona Hamou, Orna Hermon, Orit Horesh, Yael Keren, Yael Lebenthal, Shlomit Shalitin (Schneider Children's Medical Center of Israel)

**Toronto:** Kristina Cordeiro, Jill Hamilton, Hahn Y Nguyen, Shawna Steele (The Hospital for Sick Children, University of Toronto)

**Coordinating Center:** Fei Chen, Alan R Dyer, Wenyu Huang, Alan Kuang, Maria Jimenez, Lynn P Lowe, William L Lowe, Jr, Boyd E Metzger, Michael Nodzenski, Anna Reisetter, Denise Scholtens, Octavious Talbot, Paul Yim (Northwestern University Feinberg School of Medicine)

**Consultants:** David Dunger, Alicia Thomas

**NIDDK:** Mary Horlick, Barbara Linder, Aynur Unalp-Arida

**NICHD:** Gilman Grave
